# Supplementary material for: Na2SrB16O26: a new borate with independent interpenetrating B–O networks and deep-ultraviolet cutoff edge
Source: Royal Society of Chemistry journal article supplement (doi:10.1039/d2dt00009a), 2022-01-01
Supplement: d2dt00009a1.pdf [file d2dt00009a1.pdf]

*Electronic Supplementary Information:*

## **Na<sub>2</sub>SrB<sub>16</sub>O<sub>26</sub>: A New Borate with Independent Interpenetrating B–O Networks and Deep-Ultraviolet Cutoff Edge**

Zhikang Chen,<sup>a</sup> Kewang Zhang,<sup>a</sup> and Jun Zhang<sup>a,\*</sup>

<sup>a</sup>School of Physics and Technology, Xinjiang University, Urumqi, Xinjiang 830046, P. R. China.

\*Corresponding author, E-mail: zhj@xju.edu.cn

### **Contents**

**Table S1.** Atomic coordinates ( $\times 10^4$ ), equivalent isotropic displacement parameters ( $\text{\AA}^2 \times 10^3$ ) and bond valence sum (BVS) calculation for Na<sub>2</sub>SrB<sub>16</sub>O<sub>26</sub>.  $U_{\text{eq}}$  is defined as one-third of the trace of the orthogonalized  $U_{ij}$  tensor.

**Table S2.** Selected bond lengths ( $\text{\AA}$ ) and angles ( $^\circ$ ) for Na<sub>2</sub>SrB<sub>16</sub>O<sub>26</sub>.

**Figure S1.** (a) The Na–O chains and isolated [SrO<sub>10</sub>] groups in Na<sub>2</sub>SrB<sub>16</sub>O<sub>26</sub>; (b) The isolated [KO<sub>8</sub>] and [BaO<sub>8</sub>] groups in K<sub>2</sub>BaB<sub>16</sub>O<sub>26</sub>.

**Figure S2.** IR spectrum.

**Figure S3.** TG-DSC curves.

**Figure S4.** Density of states (DOS).

**Table S1.** Atomic coordinates ( $\times 10^4$ ), equivalent isotropic displacement parameters ( $\text{\AA}^2 \times 10^3$ ) and bond valence sum (BVS) calculation for  $\text{Na}_2\text{SrB}_{16}\text{O}_{26}$ .  $U_{\text{eq}}$  is defined as one-third of the trace of the orthogonalized  $U_{ij}$  tensor.

| Atom | x        | y        | z       | $U_{\text{eq}}^{\text{a}}$ | BVS <sup>b</sup> |
|------|----------|----------|---------|----------------------------|------------------|
| Sr1  | 5000     | 5000     | 10000   | 26(1)                      | 2.0              |
| Na1  | 8831(1)  | 3960(3)  | 6829(2) | 49(1)                      | 0.9              |
| B1   | 10607(2) | 1845(3)  | 4544(3) | 12(1)                      | 3.0              |
| B2   | 8913(2)  | 3935(4)  | 3908(3) | 13(1)                      | 3.0              |
| B3   | 7325(2)  | 5890(4)  | 3833(3) | 11(1)                      | 3.0              |
| B4   | 6185(2)  | 5943(4)  | 5600(3) | 11(1)                      | 3.0              |
| B5   | 5011(2)  | 6450(4)  | 7216(3) | 10(1)                      | 3.0              |
| B6   | 3610(2)  | 8902(3)  | 7533(3) | 9(1)                       | 3.1              |
| B7   | 2080(2)  | 9794(4)  | 5509(3) | 12(1)                      | 3.0              |
| B8   | 1837(2)  | 10518(4) | 3147(3) | 12(1)                      | 3.0              |
| O1   | 11123(2) | 848(3)   | 5598(2) | 15(1)                      | 1.9              |
| O2   | 10985(2) | 1840(3)  | 3403(2) | 17(1)                      | 1.9              |
| O3   | 9689(2)  | 2879(2)  | 4752(2) | 13(1)                      | 2.0              |
| O4   | 8893(2)  | 4143(3)  | 2627(2) | 17(1)                      | 2.0              |
| O5   | 8195(2)  | 4865(2)  | 4562(2) | 14(1)                      | 2.1              |
| O6   | 7320(2)  | 6271(2)  | 2571(2) | 14(1)                      | 1.9              |
| O7   | 6670(2)  | 4530(2)  | 6234(2) | 12(1)                      | 2.0              |
| O8   | 6470(2)  | 6539(2)  | 4456(2) | 14(1)                      | 2.0              |
| O9   | 5296(2)  | 6887(2)  | 6018(2) | 12(1)                      | 2.1              |
| O10  | 5584(2)  | 5105(2)  | 7916(2) | 11(1)                      | 2.3              |
| O11  | 4172(1)  | 7210(2)  | 7752(2) | 11(1)                      | 2.0              |
| O12  | 2508(2)  | 8791(2)  | 6561(2) | 14(1)                      | 2.0              |
| O13  | 2514(2)  | 9783(2)  | 4388(2) | 16(1)                      | 1.9              |

<sup>a</sup> $U_{\text{eq}}$  is defined as one third of the trace of the orthogonalized  $U_{ij}$  tensor.

<sup>b</sup>BVS are calculated by using the bond-valence model ( $S_i = \exp[(R_o - R_i)/B]$ , where  $R_o$  is an empirical constant,  $R_i$  is the length of bond (in angstroms), and  $B = 0.37$ ).

**Table S2.** Selected bond lengths (Å) and angles (°) for Na<sub>2</sub>SrB<sub>16</sub>O<sub>26</sub>.

|                      |            |                   |            |
|----------------------|------------|-------------------|------------|
| Sr(1)-O(11)          | 2.8943(18) | B(2)-O(5)         | 1.379(3)   |
| Sr(1)-O(11)#1        | 2.8942(18) | B(3)-O(5)         | 1.378(3)   |
| Sr(1)-O(9)#2         | 2.6274(18) | B(3)-O(6)         | 1.342(3)   |
| Sr(1)-O(9)#3         | 2.6274(18) | B(3)-O(8)         | 1.382(3)   |
| Sr(1)-O(8)#3         | 3.2843(18) | B(4)-O(7)         | 1.339(3)   |
| Sr(1)-O(8)#2         | 3.2843(18) | B(4)-O(8)         | 1.377(3)   |
| Sr(1)-O(10)#1        | 2.3984(19) | B(4)-O(9)         | 1.401(3)   |
| Sr(1)-O(10)          | 2.3984(19) | B(5)-O(9)         | 1.393(3)   |
| Sr(1)-O(13)#2        | 2.8137(19) | B(5)-O(10)        | 1.361(3)   |
| Sr(1)-O(13)#3        | 2.8137(19) | B(5)-O(11)        | 1.348(3)   |
| Na(1)-O(7)           | 2.483(2)   | B(6)-O(7)#2       | 1.467(3)   |
| Na(1)-O(3)           | 2.688(2)   | B(6)-O(10)#2      | 1.460(3)   |
| Na(1)-O(5)           | 2.421(2)   | B(6)-O(11)        | 1.460(3)   |
| Na(1)-O(2)#4         | 2.750(2)   | B(6)-O(12)        | 1.454(3)   |
| Na(1)-O(12)#2        | 2.503(2)   | B(7)-O(1)#7       | 1.392(3)   |
| Na(1)-O(4)#4         | 2.538(3)   | B(7)-O(12)        | 1.349(3)   |
| Na(1)-O(4)#5         | 2.962(3)   | B(7)-O(13)        | 1.360(4)   |
| B(1)-O(1)            | 1.372(3)   | B(8)-O(2)#7       | 1.481(3)   |
| B(1)-O(2)            | 1.345(4)   | B(8)-O(4)#6       | 1.487(3)   |
| B(1)-O(3)            | 1.380(3)   | B(8)-O(6)#6       | 1.465(3)   |
| B(2)-O(3)            | 1.384(3)   | B(8)-O(13)        | 1.476(3)   |
| B(2)-O(4)            | 1.336(3)   |                   |            |
| O(11)#1-Sr(1)-O(11)  | 180.00(5)  | O(7)-Na(1)-O(4)#4 | 102.06(9)  |
| O(11)#1-Sr(1)-O(8)#2 | 58.28(5)   | O(7)-Na(1)-O(4)#5 | 139.94(10) |
| O(11)-Sr(1)-O(8)#2   | 121.72(5)  | O(3)-Na(1)-O(2)#4 | 88.21(7)   |
| O(11)#1-Sr(1)-O(8)#3 | 121.72(5)  | O(3)-Na(1)-O(4)#5 | 81.25(6)   |
| O(11)-Sr(1)-O(8)#3   | 58.28(5)   | O(5)-Na(1)-O(7)   | 67.60(7)   |
| O(9)#2-Sr(1)-O(11)   | 102.96(5)  | O(5)-Na(1)-O(3)   | 52.94(6)   |

---

|                           |           |                      |            |
|---------------------------|-----------|----------------------|------------|
| O(9)#2-Sr(1)-O(11)#1      | 77.04(5)  | O(5)-Na(1)-O(2)#4    | 134.32(8)  |
| O(9)#3-Sr(1)-O(11)        | 77.04(5)  | O(5)-Na(1)-O(12)#2   | 124.03(8)  |
| O(9)#3-Sr(1)-O(11)#1      | 102.96(5) | O(5)-Na(1)-O(4)#5    | 96.91(8)   |
| O(9)#3-Sr(1)-O(9)#2       | 180       | O(5)-Na(1)-O(4)#4    | 125.05(11) |
| O(9)#3-Sr(1)-O(8)#3       | 44.86(5)  | O(2)#4-Na(1)-O(4)#5  | 48.76(6)   |
| O(9)#2-Sr(1)-O(8)#3       | 135.14(5) | O(12)#2-Na(1)-O(3)   | 154.25(11) |
| O(9)#3-Sr(1)-O(8)#2       | 135.14(5) | O(12)#2-Na(1)-O(2)#4 | 101.46(7)  |
| O(9)#2-Sr(1)-O(8)#2       | 44.86(5)  | O(12)#2-Na(1)-O(4)#4 | 73.27(7)   |
| O(9)#2-Sr(1)-O(13)#2      | 94.46(5)  | O(12)#2-Na(1)-O(4)#5 | 122.99(9)  |
| O(9)#3-Sr(1)-O(13)#2      | 85.54(5)  | O(4)#4-Na(1)-O(3)    | 88.68(9)   |
| O(9)#3-Sr(1)-O(13)#3      | 94.46(5)  | O(4)#4-Na(1)-O(2)#4  | 68.38(7)   |
| O(9)#2-Sr(1)-O(13)#3      | 85.54(5)  | O(4)#4-Na(1)-O(4)#5  | 116.35(6)  |
| O(8)#3-Sr(1)-O(8)#2       | 180       | O(1)-B(1)-O(3)       | 115.0(2)   |
| O(10)-Sr(1)-O(11)#1       | 129.87(5) | O(2)-B(1)-O(3)       | 122.6(2)   |
| O(10)#1-Sr(1)-<br>O(11)#1 | 50.13(5)  | O(2)-B(1)-O(1)       | 122.3(2)   |
| O(10)-Sr(1)-O(11)         | 50.13(5)  | O(5)-B(2)-O(3)       | 111.9(2)   |
| O(10)#1-Sr(1)-O(11)       | 129.87(5) | O(4)-B(2)-O(3)       | 125.3(2)   |
| O(10)-Sr(1)-O(9)#2        | 72.85(6)  | O(4)-B(2)-O(5)       | 122.6(2)   |
| O(10)#1-Sr(1)-O(9)#3      | 72.85(6)  | O(6)-B(3)-O(8)       | 121.2(2)   |
| O(10)#1-Sr(1)-O(9)#2      | 107.15(6) | O(6)-B(3)-O(5)       | 121.3(2)   |
| O(10)-Sr(1)-O(9)#3        | 107.15(6) | O(5)-B(3)-O(8)       | 117.5(2)   |
| O(10)-Sr(1)-O(8)#3        | 64.22(5)  | O(7)-B(4)-O(9)       | 122.2(2)   |
| O(10)#1-Sr(1)-O(8)#2      | 64.22(5)  | O(7)-B(4)-O(8)       | 123.3(2)   |
| O(10)-Sr(1)-O(8)#2        | 115.78(5) | O(8)-B(4)-O(9)       | 114.4(2)   |
| O(10)#1-Sr(1)-O(8)#3      | 115.78(5) | O(11)-B(5)-O(9)      | 125.8(2)   |
| O(10)#1-Sr(1)-O(10)       | 180       | O(11)-B(5)-O(10)     | 115.2(2)   |
| O(10)-Sr(1)-O(13)#2       | 75.06(6)  | O(10)-B(5)-O(9)      | 119.0(2)   |
| O(10)#1-Sr(1)-            | 75.06(6)  | O(11)-B(6)-O(7)#8    | 109.5(2)   |

---

|                           |           |                      |            |
|---------------------------|-----------|----------------------|------------|
| O(13)#3                   |           |                      |            |
| O(10)#1-Sr(1)-<br>O(13)#2 | 104.94(6) | O(11)-B(6)-O(10)#8   | 109.32(19) |
| O(10)-Sr(1)-O(13)#3       | 104.94(6) | O(10)#8-B(6)-O(7)#8  | 109.7(2)   |
| O(13)#3-Sr(1)-O(11)       | 68.35(5)  | O(12)-B(6)-O(11)     | 110.6(2)   |
| O(13)#2-Sr(1)-O(11)       | 111.65(5) | O(12)-B(6)-O(7)#8    | 107.8(2)   |
| O(13)#3-Sr(1)-<br>O(11)#1 | 111.65(5) | O(12)-B(6)-O(10)#8   | 109.9(2)   |
| O(13)#2-Sr(1)-<br>O(11)#1 | 68.35(5)  | O(12)-B(7)-O(1)#10   | 116.5(2)   |
| O(13)#3-Sr(1)-O(8)#3      | 116.85(5) | O(12)-B(7)-O(13)     | 123.6(2)   |
| O(13)#2-Sr(1)-O(8)#3      | 63.15(5)  | O(13)-B(7)-O(1)#10   | 119.9(2)   |
| O(13)#2-Sr(1)-O(8)#2      | 116.85(5) | O(6)#11-B(8)-O(2)#10 | 110.6(2)   |
| O(13)#3-Sr(1)-O(8)#2      | 63.15(5)  | O(6)#11-B(8)-O(4)#11 | 111.8(2)   |
| O(13)#3-Sr(1)-<br>O(13)#2 | 180.00(8) | O(6)#11-B(8)-O(13)   | 108.1(2)   |
| O(7)-Na(1)-O(3)           | 111.93(8) | O(2)#10-B(8)-O(4)#11 | 105.7(2)   |
| O(7)-Na(1)-O(2)#4         | 157.99(9) | O(13)-B(8)-O(2)#10   | 111.2(2)   |
| O(7)-Na(1)-O(12)#2        | 56.53(7)  | O(13)-B(8)-O(4)#11   | 109.5(2)   |

Symmetry transformations used to generate equivalent atoms:

|                             |                                 |                                |
|-----------------------------|---------------------------------|--------------------------------|
| #1 $-x + 1, -y + 1, -z + 2$ | #2 $-x + 1, y - 1/2, -z + 3/2$  | #3 $x, -y + 3/2, z + 1/2$      |
| #4 $x, -y + 1/2, z + 1/2$   | #5 $-x + 2, -y + 1, -z + 1$     | #6 $-x + 1, y - 1/2, -z + 1/2$ |
| #7 $x + 1, y - 1, z$        | #8 $-x + 1, y + 1/2, -z + 3/2$  | #9 $x, -y + 1/2, z - 1/2$      |
| #10 $x - 1, y + 1, z$       | #11 $-x + 1, y + 1/2, -z + 1/2$ |                                |

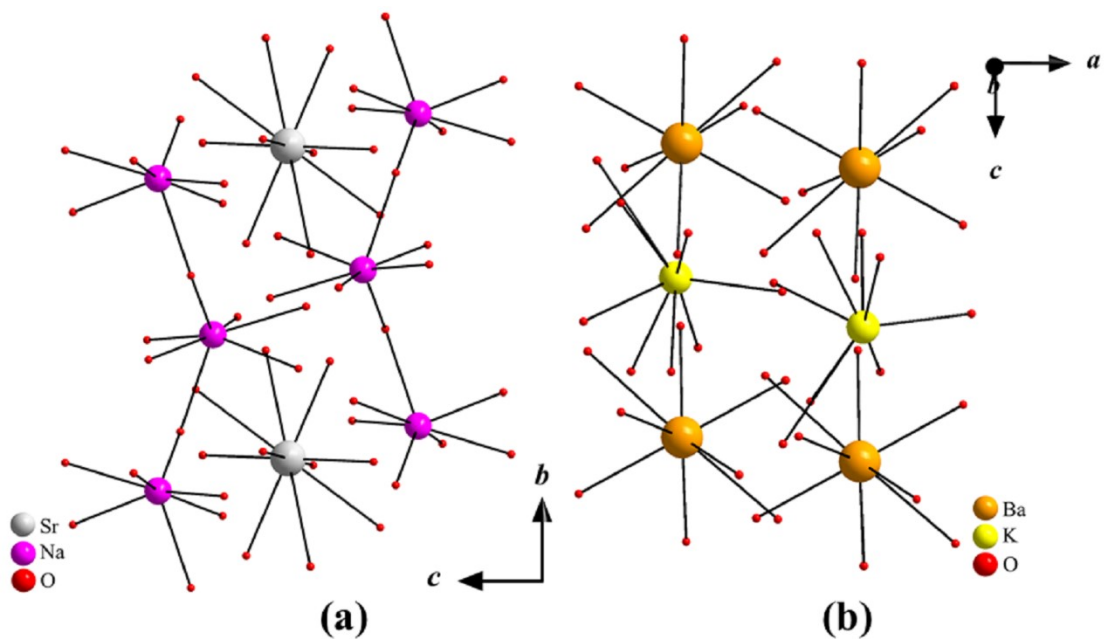

**Figure S1.** (a) The Na–O chains and isolated  $[\text{SrO}_{10}]$  groups in  $\text{Na}_2\text{SrB}_{16}\text{O}_{26}$ ; (b) The isolated  $[\text{KO}_8]$  and  $[\text{BaO}_8]$  groups in  $\text{K}_2\text{BaB}_{16}\text{O}_{26}$ .

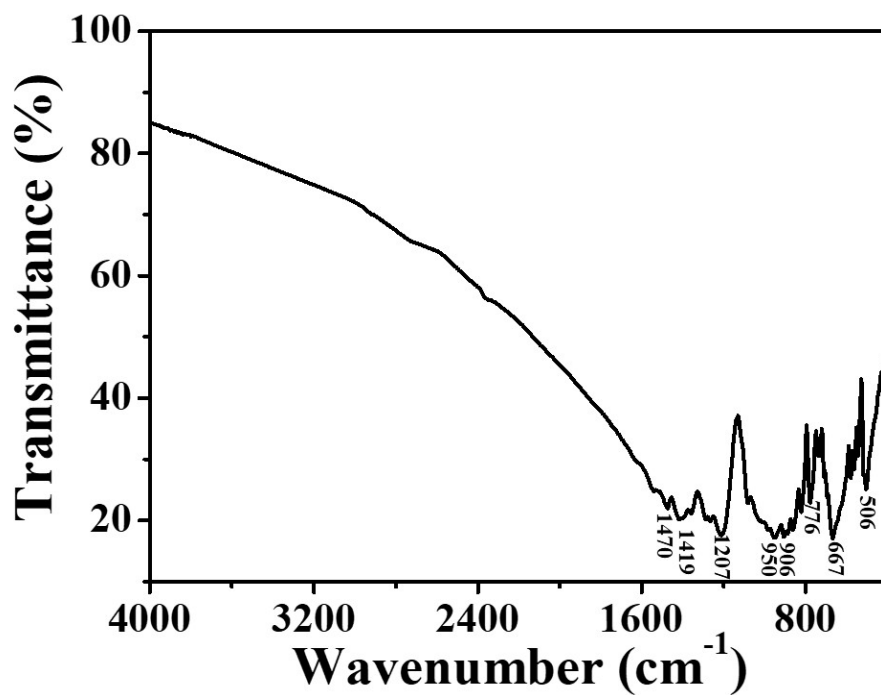

**Figure S2.** IR spectrum.

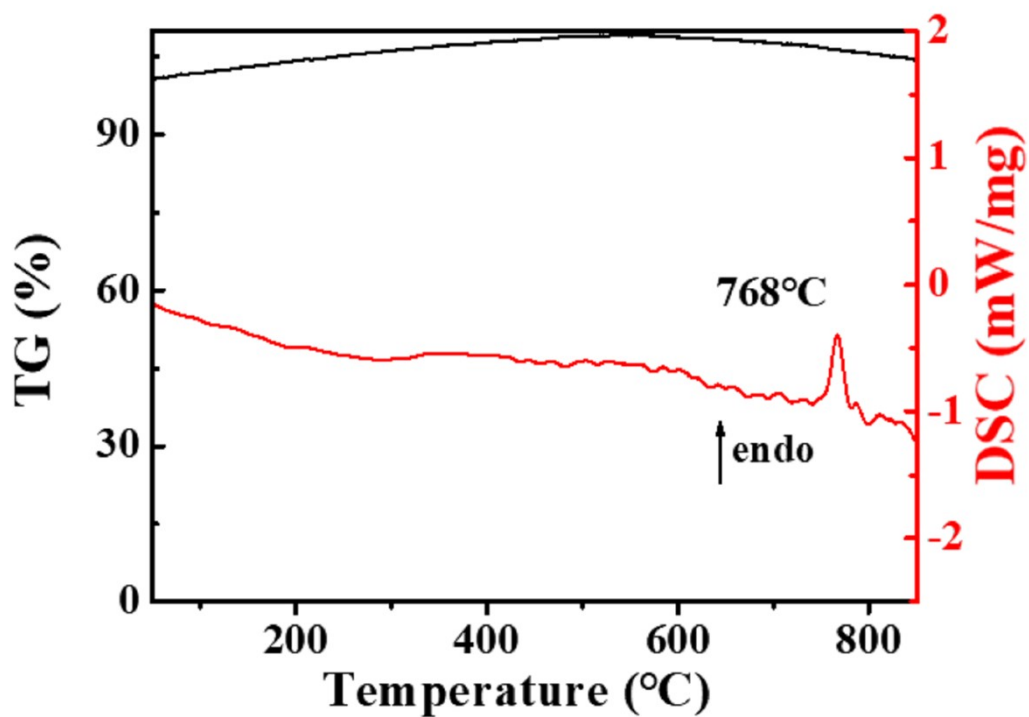

Figure S3. TG-DSC curves.

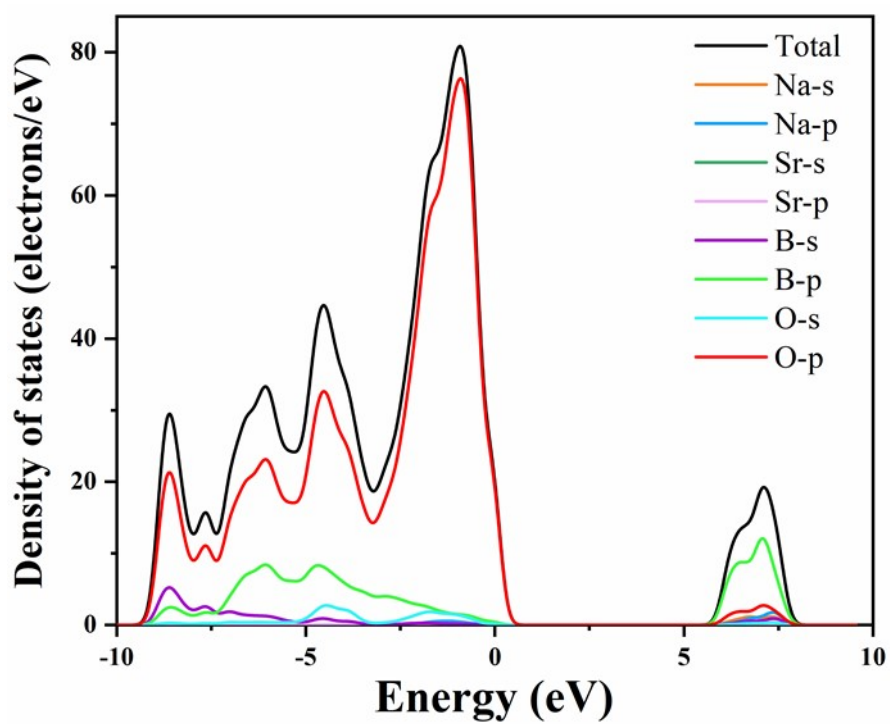

Figure S4. Density of states (DOS).
